# Supplementary material for: Lactoferrin Deficiency Impairs Proliferation of Satellite Cells via Downregulating the ERK1/2 Signaling Pathway
Source: MDPI journal article supplement (doi:10.3390/ijms23137478), 2022-07-05
Supplement: s1 [file s1]

**Table S2 Primer sequence of PCR**

| Primer   | Sequence (5'-3')           | Product size (bp) |
|----------|----------------------------|-------------------|
| WT-F     | TGCTGGGATTTCGAACTTGGCTGAAG | 404               |
| WT-R     | AGACCGAGGAATCTGTGTGAGACCT  |                   |
| Ltf-KO-F | CGCCGCTCAGTTGTGTCAAGAAATC  | 564               |
| Ltf-KO-R | AGACCGAGGAATCTGTGTGAGACCT  |                   |
