# Supplementary material for: Lactoferrin Deficiency Impairs Proliferation of Satellite Cells via Downregulating the ERK1/2 Signaling Pathway
Source: MDPI journal article supplement (doi:10.3390/ijms23137478), 2022-07-05
Supplement: s1 [file s1]

**Table S1 Primer sequence of guide sgRNA**

| Target site | Sequence (5'-3')        |
|-------------|-------------------------|
| 5'Guide     | ATGGCATCTAGGGCTGCACCAGG |
| 3'Guide     | CTAGTGTATACCCCAAAGGCTGG |
