# Supplementary material for: Lactoferrin Deficiency Impairs Proliferation of Satellite Cells via Downregulating the ERK1/2 Signaling Pathway
Source: Int J Mol Sci. 2022 Jul 5;23(13):7478. doi: 10.3390/ijms23137478 (PMC9267821; doi:10.3390/ijms23137478)
Supplement: Supplementary file 1 [file ijms-23-07478-s001.zip]

Archive with 6 entries (6 files):
- Supplementary Figure Legends.pdf
- Supplementary Figure S1.tif
- Supplementary Figure S2.tif
- Supplementary Figure S3.tif
- Supplementary Table S1.pdf
- Supplementary Table S2.pdf
